# Supplementary material for: The selective transfer of patterned graphene
Source: PubMed Central journal article supplement — Sci Rep. 2013 Nov 14;3:3216. doi: 10.1038/srep03216 (PMC3827613; doi:10.1038/srep03216), 2013-11-14
Supplement: srep03216-s1.pdf [file srep03216-s1.pdf]

*Supplementary Information for*

**The Selective Transfer of Patterned Graphene:**

Xu-Dong Chen<sup>1</sup>, Zhi-Bo Liu<sup>1,\*</sup>, Wen-Shuai Jiang<sup>1</sup>, Xiao-Qing Yan<sup>1,2</sup>, Fei Xing<sup>1</sup>, and

Yongsheng Chen<sup>2</sup>, Jian-Guo Tian<sup>1,\*</sup>

<sup>1</sup> The Key Laboratory of Weak Light Nonlinear Photonics, Ministry of Education, Teda Applied  
Physics School and School of Physics, Nankai University, Tianjin 300457, China

<sup>2</sup> The Key Laboratory of Functional Polymer Materials and Center for Nanoscale Science &  
Technology, Institute of Polymer Chemistry, College of Chemistry, Nankai University, Tianjin  
300071, China

\*email: [rainingsstar@nankai.edu.cn](mailto:rainingsstar@nankai.edu.cn), [jitian@nankai.edu.cn](mailto:jitian@nankai.edu.cn)

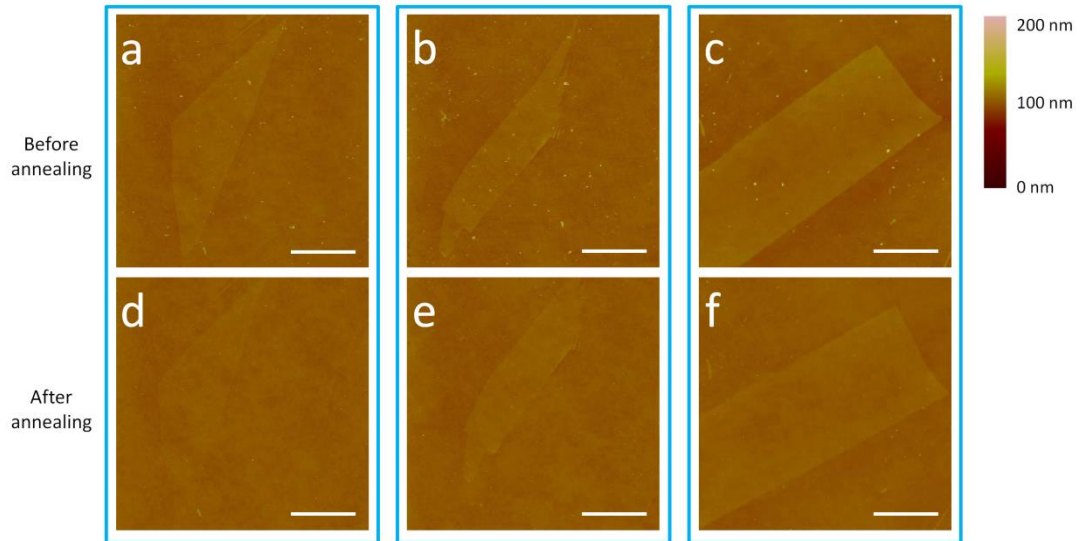

Figure S1| AFM images of few-layer graphene flakes transferred to flat SiO<sub>2</sub>/Si wafers using the selective transfer technique (a-c) before and (d-f) after annealing. The scale bar is 10 μm.

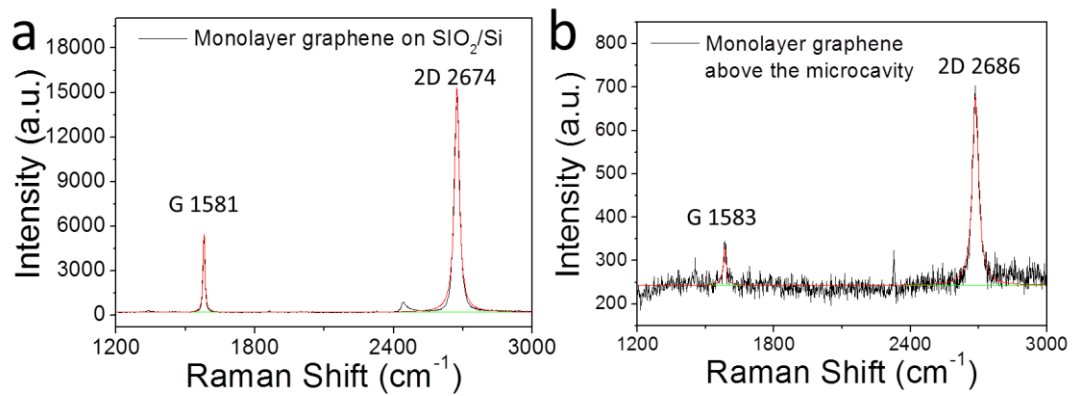

Figure S2| The Raman spectra of the monolayer graphene transferred selectively to a chosen microcavity. **a**, Graphene surrounded the microcavity and **b**, graphene above the microcavity.

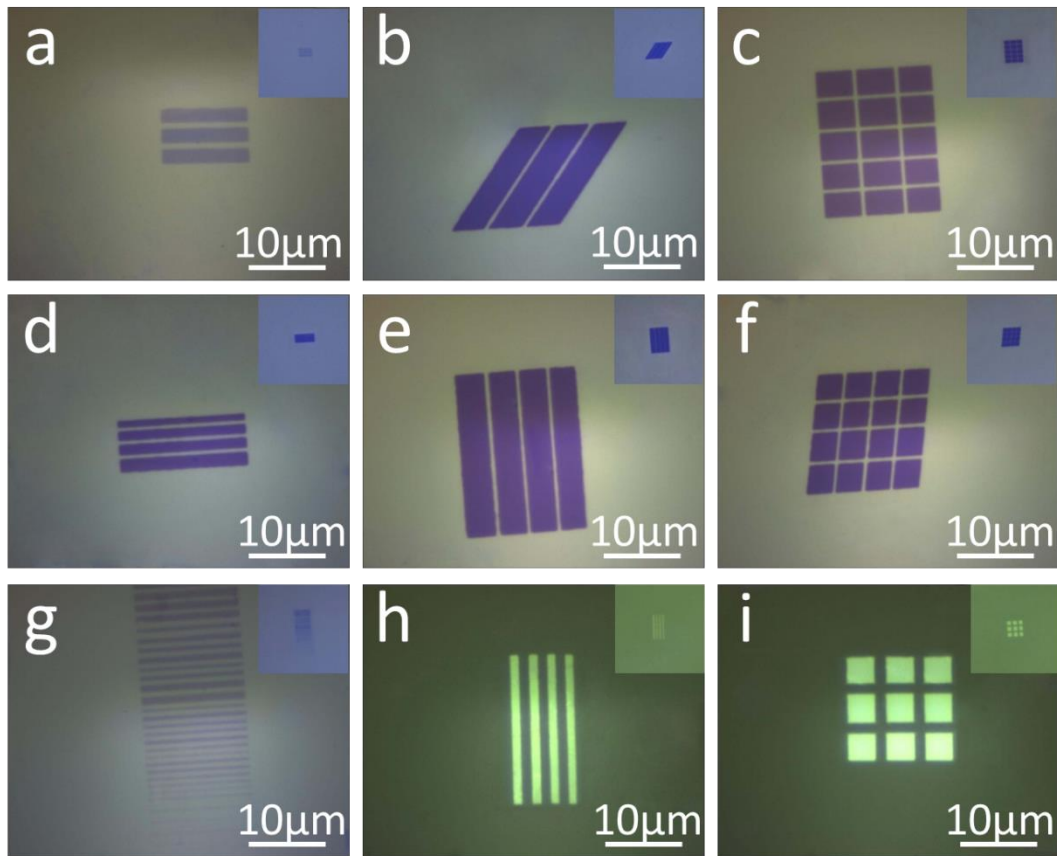

Figure S3| Optical images of different graphene patterns with different thickness transferred to (a-g) Si/SiO<sub>2</sub> wafers, (h) quartz, and (i) PET film.

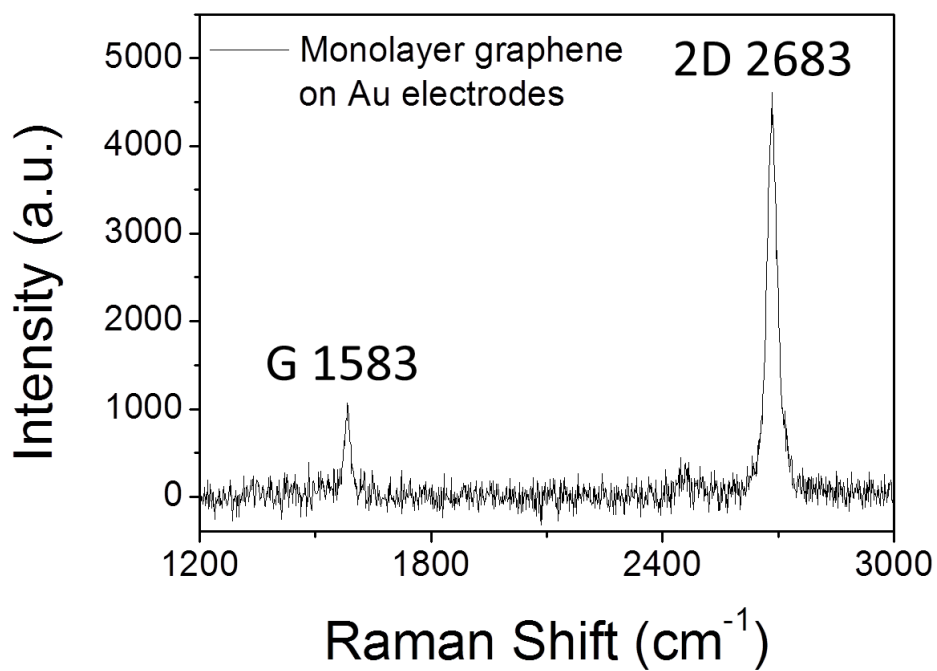

Figure S4| The Raman spectrum of the monolayer graphene on Au electrodes. The graphene was transferred onto Au electrodes using the selective transfer technique to fabricate MG-based FET.

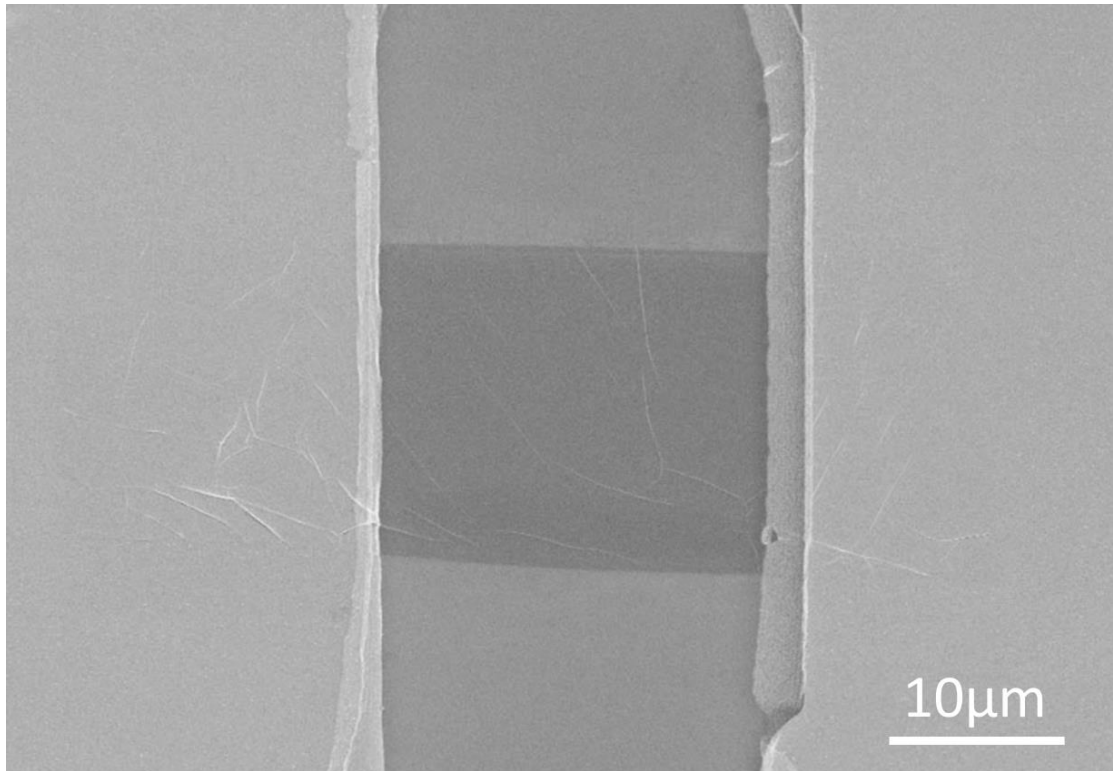

Figure S5 | SEM image of the graphene FET fabricated by depositing Au electrodes on graphene. The graphene was contaminated during the fabrication process.

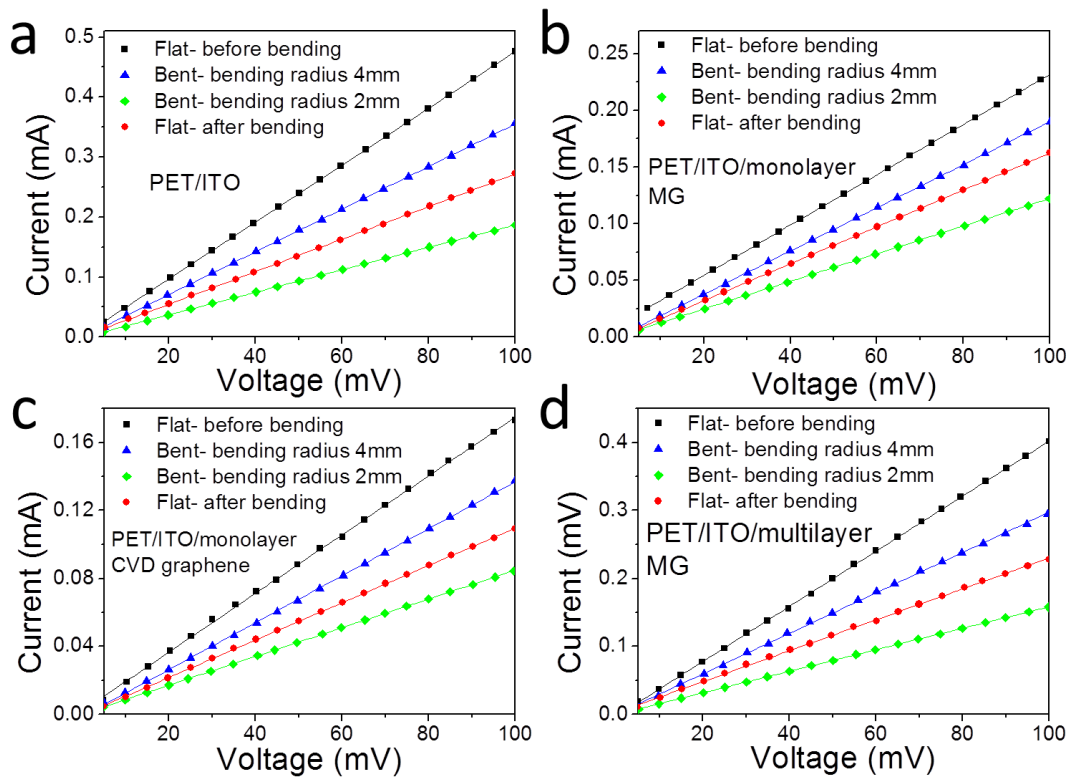

Figure S6| The current as a function of the voltage for the four devices measured during the bending tests.
